# Supplementary material
Source: PubMed Central journal article supplement (PMC2770745)

**A**

S100A1 in pipette; 0 mV

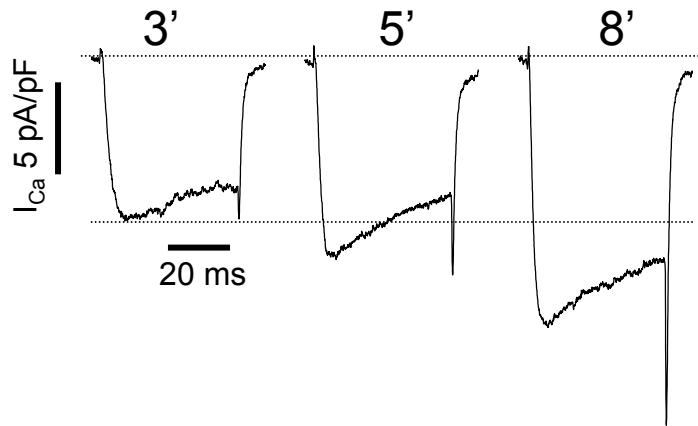**B**Nifedipine pre-tx,  
S100A1 in pipette; 0 mV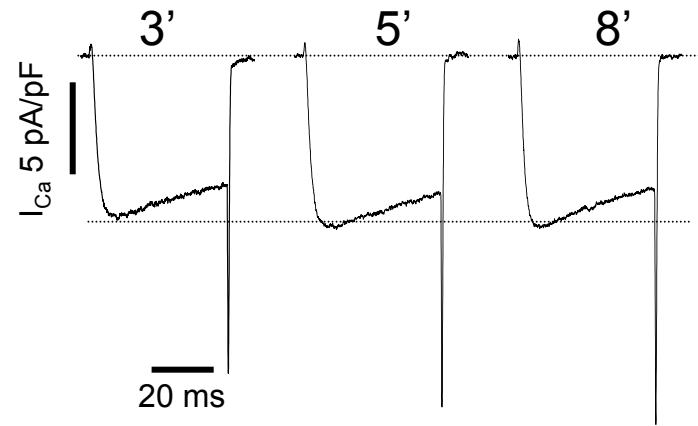

Supp Fig. 1

Supplement: 00140.2009_1.pdf [file 00140.2009_1.pdf]

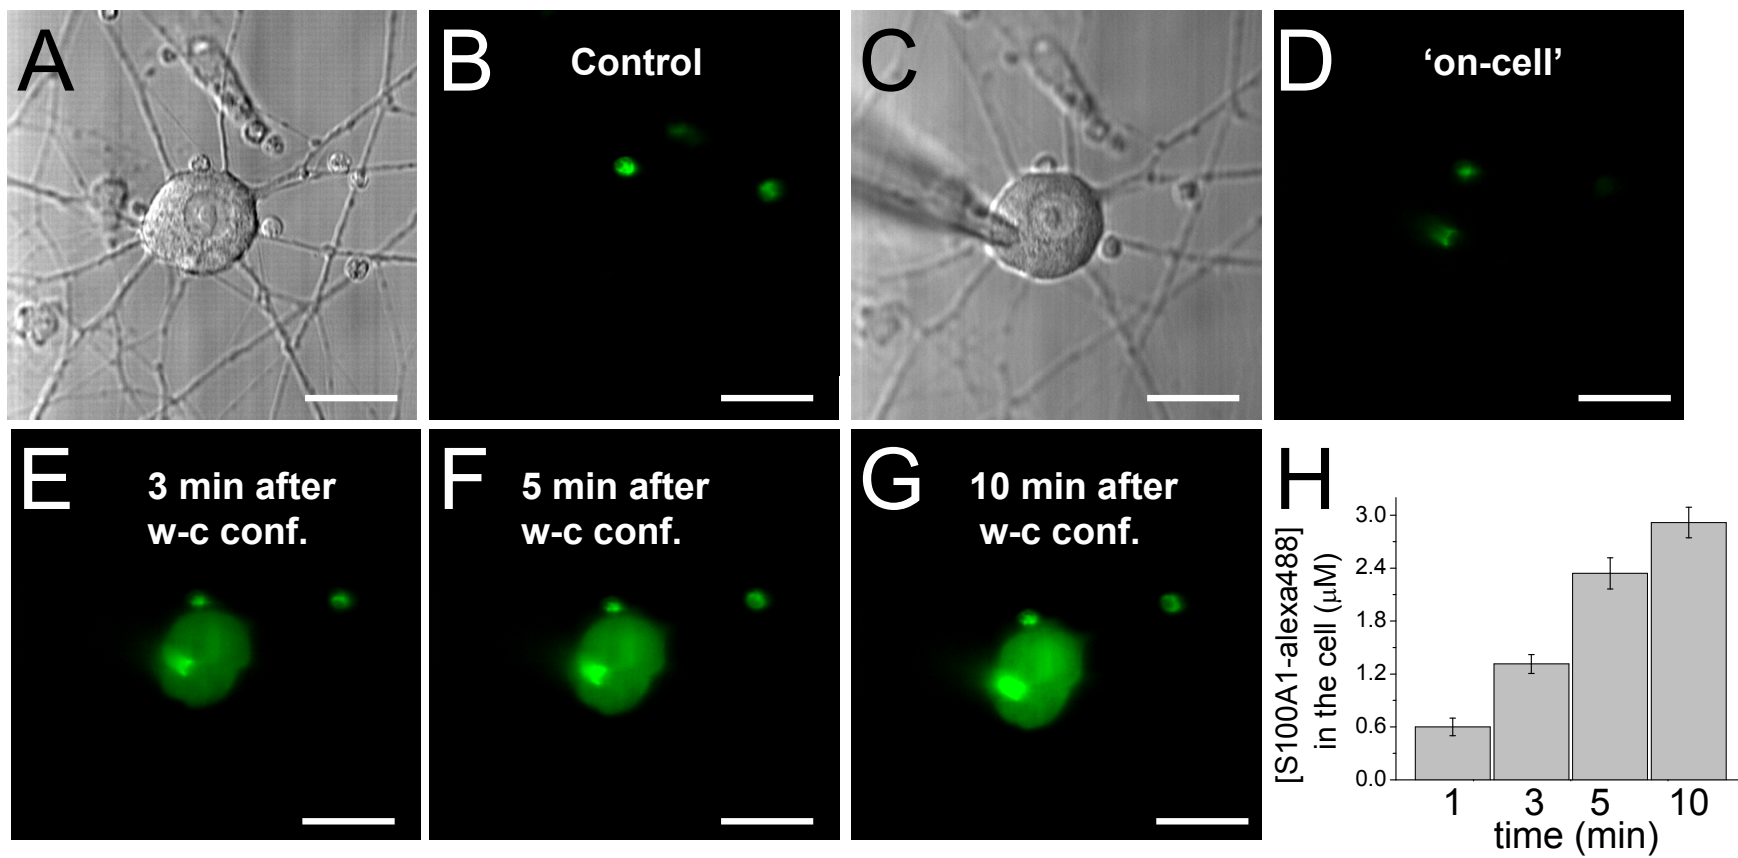

Supp Fig. 2

Supplement: 00140.2009_2.pdf [file 00140.2009_2.pdf]
